1 **Kismet/CHD7/CHD8 affects gut biomechanics, the gut**  
2 **microbiome, and gut-brain axis in *Drosophila melanogaster***

3 Angelo Niosi <sup>1</sup>, Nguyễn Henry Võ <sup>1</sup>, Punithavathi Sundar <sup>3</sup>, Chloe Welch <sup>1</sup>, Aliyah Penn <sup>1</sup>,

4 Yelena Yuldasheva <sup>1</sup>, Adam Alfareh <sup>1</sup>, Kaitlin Rausch <sup>1</sup>, Takhmina Rukhsar <sup>1</sup>, Jeffery

5 Cavanaugh <sup>2</sup>, Prince Yadav <sup>2</sup>, Stephanie Peterson <sup>1</sup>, Raina Brown <sup>1</sup>, Alain Hu <sup>1</sup>, Any Ardon-

6 Castro <sup>1</sup>, Darren Nguyen <sup>1</sup>, Robert Crawford <sup>1</sup>, Wendy Lee <sup>3</sup>, Mikkel Herholdt Jensen <sup>2</sup>, Eliza J.

7 Morris <sup>2</sup>, Kimberly Mulligan <sup>1\*</sup>

8

9 <sup>1</sup> Department of Biological Sciences, California State University, Sacramento, 6000 J Street,  
10 Sacramento, CA 95819

11 <sup>2</sup> Department of Physics and Astronomy, California State University, Sacramento, 6000 J Street,  
12 Sacramento, CA 95819

13 <sup>3</sup> Department of Computer Science, San Jose State University, 1 Washington Sq, San Jose, CA  
14 95192, USA

15 \* Corresponding author

16 Email: [kimberly.mulligan@csus.edu](mailto:kimberly.mulligan@csus.edu) (KM)

17

18

## 19 **Abstract**

20 The gut-brain axis may contribute to the pathophysiology of neurodevelopmental disorders, yet it  
21 is often unclear how risk genes associated with these disorders affect gut physiology in a manner  
22 that could impact microbial colonization. We addressed this question using *Drosophila*  
23 *melanogaster* with a null mutation in *kismet*, the ortholog of chromodomain helicase DNA-  
24 binding protein (*CHD*) family members *CHD7* and *CHD8*. In humans, *CHD7* and *CHD8* are risk  
25 genes for neurodevelopmental disorders with co-occurring gastrointestinal symptoms. We found  
26 *kismet* mutant flies have a significant increase in gastrointestinal transit time, indicating  
27 functional homology of *kismet* with *CHD7/CHD8* in vertebrates. To measure gut tissue  
28 mechanics, we used a high-precision force transducer and length controller, capable of  
29 measuring forces to micro-Newton precision, which revealed significant changes in the  
30 mechanics of *kismet* mutant guts, in terms of elasticity, strain stiffening, and tensile strength.  
31 Using 16S rRNA metagenomic sequencing, we also found *kismet* mutants have reduced diversity  
32 of gut microbiota at every taxonomic level and an increase in pathogenic taxa. To investigate the  
33 connection between the gut microbiome and behavior, we depleted gut microbiota in *kismet*  
34 mutant and control flies and measured courtship behavior. Depletion of gut microbiota rescued  
35 courtship defects of *kismet* mutant flies, indicating a connection between gut microbiota and  
36 behavior. In striking contrast, depletion of gut microbiome in the control strain reduced courtship  
37 activity. This result demonstrated that antibiotic treatment can have differential impacts on  
38 behavior that may depend on the status of microbial dysbiosis in the gut prior to depletion. We  
39 propose that Kismet influences multiple gastrointestinal phenotypes that contribute to the gut-  
40 brain axis to influence behavior. Based on our results, we also suggest that gut tissue mechanics

41 should be considered as an element in the gut-brain communication loop, both influenced by and  
42 potentially influencing the gut microbiome and neuronal development.

43

## 44 **Introduction**

45 The symbiotic relationships we share with our microbiome are critical for human development  
46 and adult homeostasis (1). The gut-brain axis specifically refers to the communication loop that  
47 exists between the gut microbiome and brain. Manipulation of gut microbiota can impact  
48 neurodevelopment and neurological function (2-4). In the opposite direction, brain-targeted  
49 interventions like cognitive behavioral therapy can modulate the gut microbiome (5). Studies  
50 seeking to define the molecular mediators of microbiota-gut-brain crosstalk have identified a  
51 variety of key players, including serotonin (6), short-chain fatty acids (SCFAs) (7), and  
52 lipopolysaccharides (8), which can communicate through the vagus nerve system (9-12).

53

54 Mounting evidence indicates that the gut microbiome is an etiological factor of  
55 neurodevelopmental disorders (NDDs) (13, 14). Analysis of fecal content has demonstrated that  
56 people with autism spectrum disorder (ASD) have altered gut microbiota when compared to  
57 neurotypical controls (14-17). Among individuals with ASD, common features of microbial  
58 dysbiosis in the gut include reduced microbial diversity and altered abundance of the  
59 predominant phyla, Firmicutes and Bacteroidetes (14, 16-20). Treating the gut dysbiosis of  
60 children with ASD with fecal microbiota transplant (FMT) from neurotypical donors can  
61 improve symptomatic behaviors (15). This same phenomenon is observed in mice; FMT from a  
62 wild-type mouse to a mouse model of ASD improved behavioral outcomes in the recipient,  
63 whereas FMT from the ASD mouse model to a wild-type mouse induced autism-like behaviors

64 (21). Further, administration of FMT in mice using stool samples from humans with ASD caused  
65 behavioral impairments in the recipient mice, suggesting that similar types of microbial dysbiosis  
66 can elicit behavioral deficits across host species (22).

67

68 Determining how genes associated with NDDs affect gut physiology and microbial colonization  
69 could expand treatment options for both gastrointestinal (GI) discomfort and behavioral  
70 symptoms. *Drosophila melanogaster* are increasingly being used to examine the gut-brain axis  
71 given the relative simplicity of their tissues and gut microbiome (23), combined with the  
72 conservation of intestinal pathophysiology between flies and mammals (24). Fruit flies also  
73 possess orthologs to risk genes associated with NDDs, including *kismet*, the ortholog to  
74 mammalian chromodomain helicase DNA-binding domain protein (CHD) family members,  
75 *CHD7* and *CHD8*. In humans, mutations in *CHD7* cause a congenital NDD called CHARGE  
76 syndrome (25), and *CHD8* is among the highest confidence risk genes for ASD (26-28). Both  
77 CHARGE syndrome and *CHD8*-associated ASD have co-occurring GI abnormalities, including  
78 reduced gut motility and constipation (29, 30).

79

80 In *Drosophila*, *kismet* is broadly expressed in the developing brain (31), as well as in intestinal  
81 stem cells (32) and enteroendocrine cells (33). Neurodevelopmental and behavioral phenotypes  
82 attributed to *Kismet* include axon growth and guidance (31), axon pruning (31, 34), synaptic  
83 vesicle recycling (35), synaptic transmission (36), sleep (37), locomotion (20), and memory  
84 recall (34, 37). *Kismet* is also critical for maintaining intestinal stem cell homeostasis (32),  
85 though its role in the gut has not been fully elucidated.

86

87 Here, we show that *Drosophila* with heterozygous loss of *kismet* exhibit a range of GI  
88 phenotypes. The *kismet* mutants had a slower GI transit time and distinct gut tissue mechanics,  
89 including changes in elasticity, strain stiffening, and tensile strength. Analysis of the gut  
90 microbiome revealed that *kismet* mutants had an altered abundance of multiple bacterial taxa in  
91 both the anterior and posterior midguts, including a decrease in Firmicutes and an increase in  
92 opportunistic pathogens. Depletion of gut microbiota using streptomycin increased courtship  
93 activity of *kismet* mutant flies, indicating a connection between the *kismet* mutant-associated gut  
94 microbiota and behavior. In contrast, depletion of gut microbiota in the control strain induced  
95 courtship defects, demonstrating that microbial depletion can have variable impacts on behavior  
96 that likely depend on the level of gut dysbiosis. We propose that *kismet* partially influences the  
97 gut-brain axis by affecting interconnected aspects of gut physiology—GI transit time,  
98 biomechanics, and microbial composition—though further investigation is needed to delineate  
99 the reciprocal interplay and molecular underpinnings of the observed phenotypes. Additionally,  
100 we suggest that mechanical communication pathways are a critical component of the gut-brain  
101 axis.

102

## 103 **Materials and Methods**

### 104 **Fly husbandry**

105 Flies were reared on a standard cornmeal-yeast-agar medium recipe that was adapted from a  
106 Bloomington *Drosophila* Stock Center recipe. All flies were maintained at 23°C, except flies  
107 used for courtship analysis, which were maintained at 25°C in a humidified incubator on a 12:12  
108 hour light-dark cycle. The *kismet* (*kis*) LM27 mutant strain—a generous gift from Dr. Daniel R.  
109 Marendza (Drexel University, Philadelphia, PA)—has a null allele of *kis* created by ethyl

110 methanesulfonate (EMS) mutagenesis (38). Because homozygous null *kis/kis* is embryonic  
111 lethal, we used heterozygous *kis<sup>LM27</sup>* mutant flies with a CyO balancer to maintain the null allele.  
112 To create an isogenic control strain, *kis/CyO* were outcrossed to a balancer strain (+/CyO) in  
113 which the + chromosome was marked by *Scutoid*. The two strains were intercrossed for ten  
114 generations and the resulting *kis/CyO* and +/CyO were used for all analyses. Canton S flies, used  
115 for courtship analysis, were from the Bloomington Stock Center.

116

### 117 **Gastrointestinal transit time**

118 Male flies aged 1-7 days post-eclosion were starved for 24 hours in hydrated starvation vials to  
119 ensure empty bowels and to induce hunger. After 24 hours, flies were placed in individual  
120 observation tubes (clear straws cut into thirds) containing food colored blue with 0.5%  
121 Bromophenol Blue, based on the method used by (39). Once blue food was ingested, indicated  
122 by blue food in the abdomen, we began recording time. Flies were repeatedly observed in five-  
123 minute increments until blue excrement was observed.

124

### 125 **Midgut length**

126 Gastrointestinal tracts of male flies aged 1-7 days post-eclosion were removed in PBS using a  
127 dissecting microscope. Digital images were captured using a Motic dissecting microscope  
128 outfitted with a digital camera. ImageJ was used to measure midgut length.

129

### 130 **Biomechanical measurements**

131 The full-length gut was dissected from flies aged 1-7 days post-eclosion and immediately  
132 mounted between two clips (Aurora Scientific, Aurora, ON) in PBS, which were attached to

133 either side of the midgut. The clips were mounted to suspend the gut between a 322C-I High-  
134 Speed Length Controller and a 403B Force Transducer (Aurora Scientific, Aurora, ON). The  
135 initially slack gut was pulled along its length at a rate of 0.01 mm/s until breaking while  
136 monitoring the tissue's extension,  $\Delta L$ , and tensile force,  $F$ . During pulling, the samples were  
137 imaged with the 10X objective lens of a standard dissection microscope. All force and extension  
138 data were collected using LabVIEW (National Instruments, Austin, TX) and analyzed in Matlab  
139 (Mathworks, Natick, MA). The extension of the gut was normalized by its initial length,  $L$ , as the  
140 strain:  $\gamma = \frac{\Delta L}{L}$ . The linear stiffness of the tissue was determined as the slope of the force-strain  
141 curve at 0% strain (i.e., for an unstretched gut), while the maximal stiffness was determined as  
142 the maximal slope of the force-strain curve during the pull (Figure 2A). The tensile strength was  
143 quantified as the maximal force and strain the tissue could reach before breaking.

144

### 145 **Metagenomic 16S rRNA sequencing**

146 Male flies aged 1-7 days post-eclosion were sterilized in 70% ethanol before guts were dissected  
147 in sterile PBS. The foregut was removed by cutting immediately posterior to the proventriculus  
148 and the hindgut was removed by cutting immediately anterior to the Malpighian tubules. Midguts  
149 (81 from each genotype) were then separated into anterior and posterior regions before being  
150 immediately snap frozen in an ethanol dry ice bath. Four samples (+/CyO-anterior, *kis*/CyO-  
151 anterior, +/CyO-posterior, *kis*/CyO-posterior) were shipped to GENEWIZ (South Plainfield, NJ),  
152 for DNA extraction and sequencing of the V3-V4 16S rRNA gene regions. Resulting sequencing  
153 data contained several of GENEWIZ's proprietary forward and reverse primers, which were  
154 removed using Cutadapt (v3.4)(40). The following steps were then performed to process the data  
155 within the QIIME2 (v.2021.4) workflow (41): (1) all FastQ files were imported into QIIME2; (2)

156 reads aligning to the *Drosophila melanogaster* genome were removed; (3) reverse reads were  
157 trimmed at > 190bp, reads were denoised, dereplicated, paired-end reads merged, and chimeras  
158 removed using DADA2 producing an amplicon sequence variant (ASV) table (42); (4) a naive  
159 Bayes classifier was trained on the V3V4 region of the 16S rRNA genes in the Genome  
160 Taxonomy Database (GTDB v.202) and was used to perform taxonomic classification for each  
161 ASV (43); (5) phylogenetic trees were constructed; and (6) table was rarefied before calculation  
162 of diversity metrics. The ASV table was converted to a frequency table within the QIIME2  
163 workflow and subsequently, heatmaps were produced to identify genus and species level  
164 taxonomic differences between the four samples using the qiime2R (v.0.99.6) package (44).  
165

## 166 **Antibiotic depletion**

167 Flies with antibiotic-depleted gut microbiota were created by adding streptomycin (STR) at a  
168 concentration of 400µg/mL to the standard cornmeal-yeast-agar medium recipe, as previously  
169 described (45). To ensure that gut microbiota were depleted, individual guts of adult male flies  
170 were homogenized and spread on De Man, Rogosa, and Sharpe (MRS) plates in serial dilutions.  
171 For dissection, flies were anesthetized on ice, the outer surface of the flies were sterilized in 70%  
172 ethanol, then rinsed in sterile PBS. Plates were incubated at 25°C for 72 hours prior to counting  
173 serial dilutions. Sterile PBS was plated as a negative control.

174

## 175 **Courtship analysis**

176 Post-eclosion males were aged in individual isolation chambers for 5-7 days at 25°C in a  
177 humidified incubator on a 12-hour light-dark cycle. Canton S virgin females were housed in vials  
178 of up to 10 females and aged for 5-7 days. After the aging period, each male was placed with an



179 untreated Canton S female in a courtship chamber and recorded for 10 minutes. The courtship  
180 behaviors—orientation, leg tapping, wing extension, licking, attempted copulation, and  
181 successful copulation—were scored. The courtship index (CI) was determined by calculating the  
182 percent of time males participated in courtship behaviors for the duration of the assay.

183

## 184 **Statistical analyses**

185 Prism 9 (GraphPad, San Diego, CA) was used to perform all statistical analyses. Normality was  
186 tested using the Anderson-Darling test. Parametric data was analyzed using Student's *t*-test. Non-  
187 parametric data was analyzed using the Mann-Whitney U test. Figures were prepared using  
188 Prism 9 and BioRender.com.

189

## 190 **Results**

### 191 **Kismet affects gastrointestinal transit time**

192 We first sought to determine if Kismet could impact GI transit time in *Drosophila*. Individuals  
193 with CHARGE syndrome and *CHD8*-associated ASD often have reduced gut motility (27, 29).  
194 Similarly, studies using zebrafish have demonstrated that *chd8* knockdown results in slower GI  
195 transit, a phenotype attributed to a reduction in the number of enteric neurons (27). Because  
196 homozygous null *kismet* mutants are embryonic lethal, we examined *Drosophila* with a null  
197 allele of *kismet* (*kis*<sup>LM27</sup>, subsequently referred to as *kis*) balanced over the Curly O (CyO)  
198 chromosome, which harbors a wild-type copy of *kismet*. Because our experimental fly strain  
199 (*kis*/CyO) included the CyO balancer, we used an isogenic control strain with the same balancer  
200 chromosome (+/CyO). To determine if Kismet affected the GI transit time in *Drosophila*, control

201 (+/CyO) and *kismet* mutant (*kis*/CyO) flies were administered food containing bromophenol  
202 blue. Flies were observed until the presence of a blue fecal deposit was detected (Figure 1A). We  
203 found *kismet* mutant flies had a significantly longer GI transit time: *kis*/CyO flies had an average  
204 transit time of  $154 \pm 92$  minutes compared to  $84 \pm 69$  minutes for control flies ( $p = 0.009$ ; Figure  
205 1B). To determine if the different GI transit times might be attributed to changes in midgut  
206 length, midguts from control and *kismet* mutant flies were measured from posterior of the foregut  
207 to anterior of the hindgut (Figure 1C). The *kismet* mutant midguts had an average length of  
208  $3.90 \pm 0.10$  mm, which was not significantly different from control midguts,  $4.15 \pm 0.11$  mm ( $p =$   
209  $0.110$ ; Figure 1D). Thus, the difference in GI transit time in *kismet* mutants cannot be explained  
210 by changes in midgut length. Other possible explanations for slower GI transit include  
211 impairments in the enteric nervous system, as observed in *chd8* knockdown zebrafish (27);  
212 disruptions in regulatory hormones secreted from enteroendocrine cells (46, 47); changes in  
213 contractility of associated visceral muscle tissue (48); and/or structural changes in GI-associated  
214 extracellular matrices (ECM), including the peritrophic matrix (49), a protective barrier that lines  
215 the lumen of the insect gut.

216

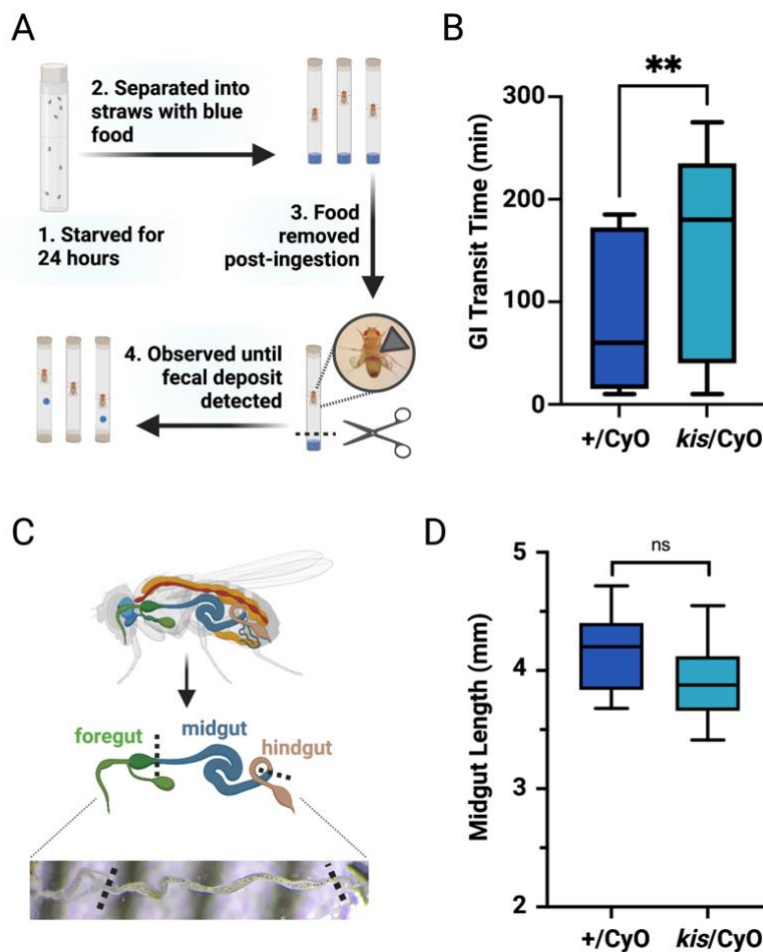

217 **Figure 1. Kismet affects GI transit time but not midgut length.** (A) Experimental scheme for  
218 measuring GI transit rate. Following a 24-hour starvation, flies were separated into individual straws  
219 containing blue food. Following ingestion, which was detected by the presence of blue food in the  
220 abdomen, the food was removed. Flies were monitored constantly until a blue fecal deposit was detected.  
221 (B) *kis*/CyO flies had a significantly slower GI transit time compared to control (+/CyO) flies. Mann-  
222 Whitney U test; \*\*  $p < 0.01$ ;  $n = 17$  for +/CyO,  $n = 23$  for *kis*/CyO. (C) Gut dissection and measurement  
223 scheme. Dissected midguts were measured using ImageJ. Dashed lines indicate measurement boundaries.  
224 (D) Midgut lengths were not significantly different between control and *kis*/CyO flies. Student's *t*-test; ns  
225 = not significant;  $n = 10$  for +/CyO,  $n = 10$  for *kis*/CyO.

226

## 227 **Biomechanical properties of the midgut are impacted by *Kismet***

228 When dissecting guts for length measurements, we noticed a stark difference in the structural  
229 integrity of *kismet* mutant midguts. We therefore conducted high-sensitivity force measurements  
230 of the dissected fly gut to determine tissue elasticity and tensile strength. After affixing guts  
231 between two clips mounted on a high-precision force transducer and length controller, we  
232 extended the midgut along its length at a constant rate (Figure 2A). Midguts were predominantly  
233 elastic at the extension rates used here, and the tissue exhibited no relaxation behavior when  
234 mechanically tested (data not shown). Although we observed no marked difference in the width  
235 of the midgut between samples under light microscopy, we did not have the resolution to  
236 accurately quantify the cross-sectional area of the hollow gut. We therefore quantified the  
237 elasticity of the midgut as the slope of the force-strain curve (Figure 2B). The *kismet* mutant  
238 midgut had a linear stiffness of  $19.9 \pm 2.9 \mu\text{N}$ , significantly lower than the  $34.6 \pm 4.6 \mu\text{N}$  of control  
239 midguts ( $p = 0.015$ ; Figure 2C). However, the *kismet* mutant midgut strain stiffened  
240 substantially, whereas the control midgut exhibited little stiffening when pulled. The *kismet*  
241 mutant midguts strain stiffened to a maximal stiffness of  $158 \pm 26 \mu\text{N}$ , significantly higher than  
242 the control midguts, which only exhibited a maximal stiffness of  $41.8 \pm 4.4 \mu\text{N}$  ( $p < 0.001$ ; Figure  
243 2D). The *kismet* mutant midguts also exhibited an increased tensile strength, reaching an ultimate  
244 tensile force of  $58.5 \pm 9.2 \mu\text{N}$  and a maximal strain of  $83.6 \pm 9.2 \%$  before failing. Both  
245 measurements were significantly higher than midguts from control flies, which failed at a force  
246 of  $23.7 \pm 2.2 \mu\text{N}$  ( $p = 0.002$ ; Figure 2E) and a strain of  $58.0 \pm 6.6 \%$  ( $p = 0.037$ ; Figure 2F). These  
247 biomechanical measurements showed that, when unstretched, *kismet* mutant midguts are softer  
248 than midguts from control flies. However, when stretched, mutant midguts exhibit substantial

249 strain stiffening and become significantly stiffer than controls. Thus, whether the *kismet* mutant  
250 midgut is stiffer or softer than the control midgut depends on whether it is stretched. The strain  
251 stiffening was dramatic; whereas control midguts largely exhibited the same stiffness regardless  
252 of how much they were stretched, mutant midguts doubled in stiffness when stretched. Mutant  
253 midguts also withstood a significantly higher force and strain before failing (Figure 2).  
254

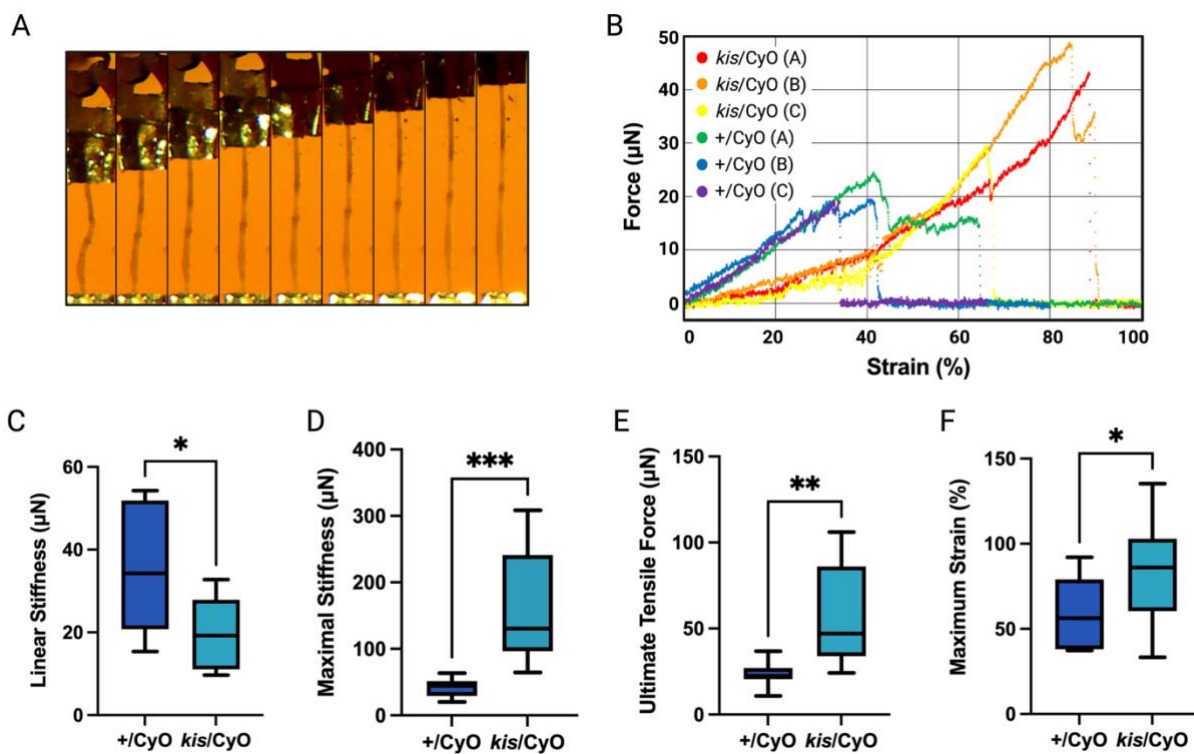

255  
256 **Figure 2. Kismet alters midgut tissue elasticity and tensile strength.** (A) Example microscopy image  
257 time lapse of a dissected midgut from a *kis/CyO* fly undergoing mechanical testing. Guts were mounted  
258 between two metal clips (visible in the top and bottom of the images) and stretched at a constant rate of  
259 0.01 mm/s. Images are 5 mm in height and 20 seconds apart. (B) Six example data sets of dissected  
260 midguts from control (+/CyO) flies and mutant (*kis/CyO*) flies. The slope of each curve indicates the  
261 stiffness of that sample. The tensile strength is quantified as the highest force and strain the tissue reached

262 before breaking. (C) *kis*/CyO flies had significantly softer midguts when unstretched, compared to control  
263 (+/CyO) flies. (D) In contrast to the control, midguts from *kis*/CyO flies strain stiffened substantially, and  
264 were significantly stiffer than midguts from +/CyO flies when under strain. (E) Midguts from *kis*/CyO  
265 flies also withstood a significantly higher force. (F) Similarly, the *kis*/CyO midguts also reached a higher  
266 strain before breaking. In (C) - (E), Student's *t*-test; \*  $p < 0.05$ ; \*\*  $p < 0.01$ ; \*\*\*  $p < 0.001$ ;  $n = 10$  for  
267 +/CyO,  $n = 10$  for *kis*/CyO.

268

### 269 **Kismet influences the composition of gut microbiota**

270 Because gut microbiota is both sensitive to and can impact a range of physiological factors in gut  
271 tissue (50, 51), we decided to characterize the microbial flora in *kismet* mutant midguts. As with  
272 all other experiments, control and *kismet* mutant flies were maintained under identical conditions  
273 to ensure that any observed differences could be attributed to the *kismet* null allele. We used 16S  
274 rRNA metagenomic sequencing to characterize the microbiota of anterior and posterior midgut  
275 regions (Figure 3A). Heatmaps were created to visualize the relative abundance of microbiota  
276 within the two genotypes at all taxonomic ranks (Figure 3B-D, Supplementary Figure 1). There  
277 were stark differences in the microbial compositions of both anterior and posterior regions of  
278 *kismet* mutant midguts at every taxonomic level, the most apparent being a deficit of numerous  
279 taxa and the consequent decrease in microbial diversity in *kismet* mutant midguts. However,  
280 there were also some taxa found in *kismet* mutant midguts that were either not detected in control  
281 midguts or detected in lower abundance. This group included the species *Acetobacter aceti*,  
282 which was only detected in *kismet* mutant midguts (Figure 3D); *A. aceti* causes gut dysfunction  
283 and shortens lifespan in *Drosophila* (52). Similarly, members of the genus *Providencia* were  
284 present in higher abundance in *kismet* mutant midguts (Supplementary Figure 1); *Providencia*  
285 are opportunistic pathogens known to interfere with immune activity in *Drosophila* (53).

286 Similarly, *Intestinibacter bartletti* was solely detected in *kismet* anterior midguts; while little is  
287 known about the role it plays in the fruit fly, a higher abundance of *I. bartletti* has been detected  
288 in the guts of children with NDDs (54). Another parallel with NDD-associated gut microbiota  
289 was the reduced abundance of butyrate-producing members of the Firmicutes phylum in *kismet*  
290 posterior midguts. Multiple studies have found a lower abundance of Firmicutes within the gut  
291 microbiome of individuals with ASD (14, 16-18, 55). One of the most abundant butyrate-  
292 producing species, *Faecalibacterium prausnitzii*, is also prominently reduced in individuals with  
293 NDDs (54); this species was not detected in *kismet* mutant posterior midguts but was present in  
294 the control.  
295

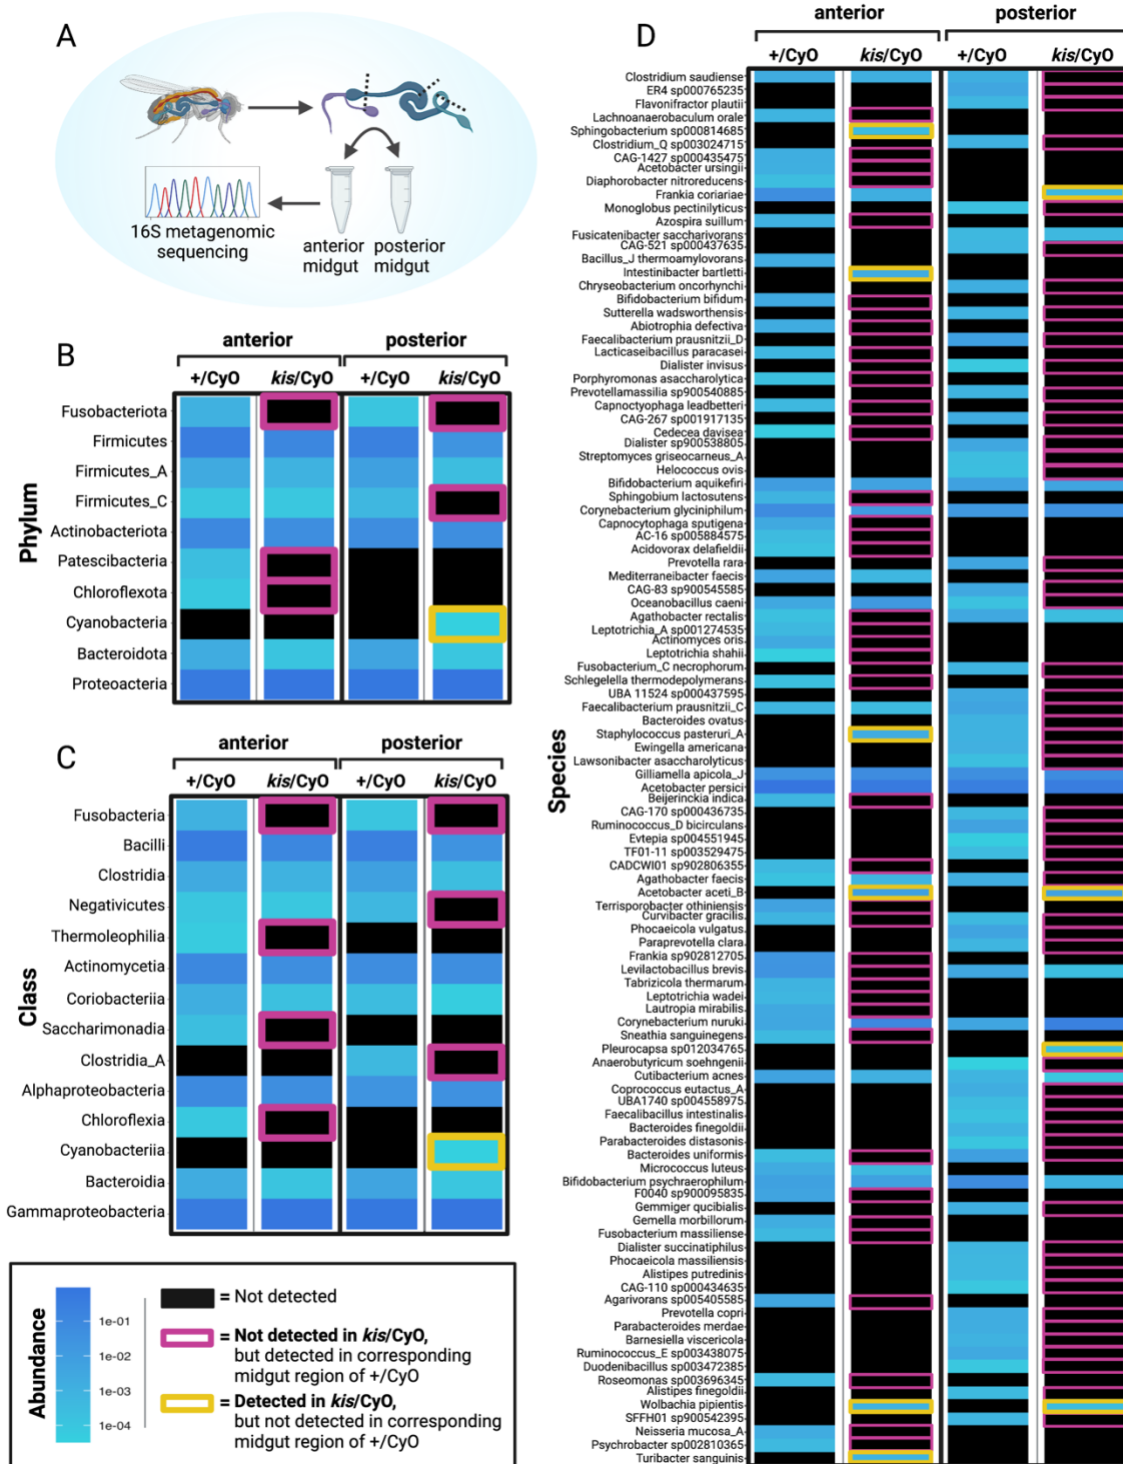

296

297 **Figure 3. Kismet affects the composition of gut microbiota.** (A) Experimental scheme: after removing

298 the foregut and hindgut, midguts were bisected into anterior and posterior midgut regions (dashed lines



299 denote cut sites), which were pooled and used for 16S rRNA metagenomic sequencing. (B - D) Heatmaps  
300 indicating the relative abundance of microbial taxa at the (B) phylum, (C) class, and (D) species levels.  
301 Relative abundance is reflected in shades of blue. Black indicates taxa that were not detected. Taxa  
302 outlined in pink were not detected in the corresponding *kis/CyO* midgut region, but were detected in  
303 control (+/CyO) midguts. Taxa outlined in yellow were detected in *kis/CyO* midguts, but were not  
304 detected in the corresponding region of control midguts.

305

### 306 **Depletion of gut microbiota differentially impacts courtship behavior**

307 Mutations in *kismet* cause a variety of neurodevelopmental and behavioral phenotypes in fruit  
308 flies (31, 34, 35, 37). While the role *Kismet* plays in neuronal subtypes is understood to affect  
309 behavioral phenotypes, we wondered if gut microbiota also affected behavior in *kismet* mutant  
310 flies. To address this question, we depleted gut microbiota using food containing low-dose  
311 streptomycin (STR) and then compared courtship behavior to flies with unadulterated  
312 microbiomes (Figure 4A). To verify that the antibiotic regimen effectively depleted gut  
313 microbiota, we measured the colony-forming units (CFU) of STR-treated and untreated flies. By  
314 plating homogenized guts, we found that STR significantly reduced the CFUs in midguts from  
315 both control ( $p = 0.001$ ) and *kis/CyO* ( $p < 0.001$ ) flies (Figure 4B). Next, we examined how  
316 depletion of gut microbiota affected courtship behaviors by determining the courtship index (CI),  
317 a global courtship score that reflects the fraction of time males spend performing courtship  
318 behaviors (56). Depletion of gut microbiota in control flies caused a significant reduction in CI,  
319 from a CI of  $0.64 \pm 0.26$  in untreated +/CyO flies to  $0.34 \pm 0.18$  in STR-treated +/CyO flies ( $p =$   
320  $0.006$ ; Figure 4C). In contrast, STR-treated *kis/CyO* flies had a significantly higher CI  
321 ( $0.48 \pm 0.33$ ) compared to untreated mutants ( $0.24 \pm 0.23$ ;  $p = 0.021$ ). Therefore, depletion of gut

322 microbiota reduced courtship activity of control flies, but increased courtship activity of *kismet*  
323 mutant flies.

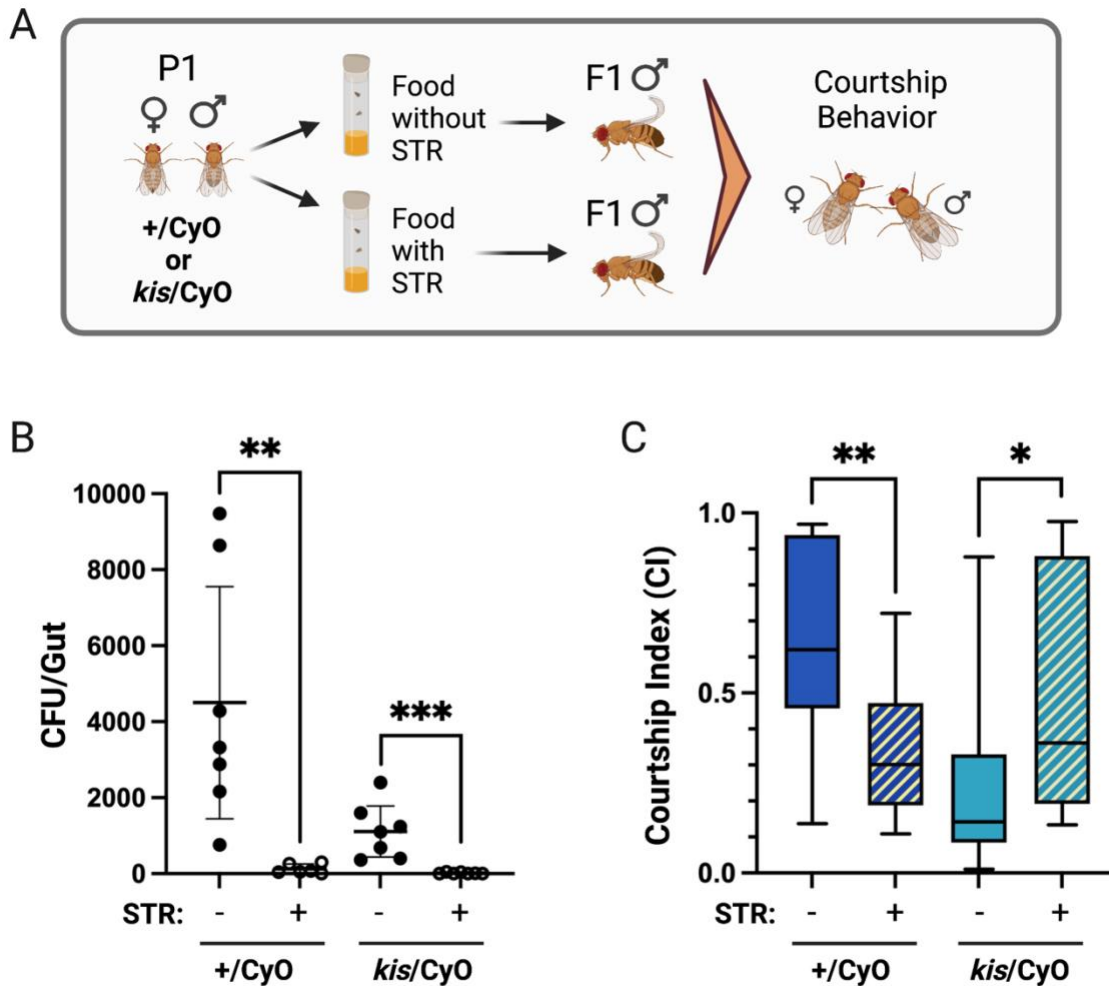

324 **Figure 4. Depletion of gut microbiota differentially impacted courtship behavior in control and**  
325 ***kismet* mutant flies.** (A) Experimental scheme: the parental (P1) generation was reared either in control  
326 food or food containing streptomycin (STR), as were the first filial (F1) offspring which were used for  
327 courtship analyses. Untreated Canton S females were paired with males from each condition. (B) Colony  
328 forming units (CFUs) of homogenized whole guts from control (+/*CyO*) and *kismet* mutant (*kis/CyO*)  
329 flies reared in control food (STR -) or STR-containing food (STR +). The horizontal lines indicate means  
330 and error bars reflect 95% confidence intervals. Each point represents an individual gut. Mann-Whitney U

331 test; \*\*  $p < 0.01$ ; \*\*\*  $p < 0.001$ . (C) Courtship index (CI) of control and *kismet* mutant flies reared in  
332 STR- or STR+ food. Mann-Whitney U test; \*  $p < 0.05$ ; \*\*\*  $p < 0.001$ ;  $n = 12$  for each condition.

333

## 334 **Discussion**

335 By investigating gut-related phenotypes of *kismet* mutant *Drosophila*, we identified differences  
336 in GI transit rate, biomechanical properties, and microbial composition, as well as a role for the  
337 gut-brain axis in modulating *Drosophila* courtship behavior. Given the circuitous nature of the  
338 microbiota-gut-brain interactions, we expect there are reciprocal interactions at play that  
339 influence each of the observed phenotypes. Because *kismet* encodes a chromatin remodeler that  
340 regulates the transcription of many genes within different cell types, the cellular and molecular  
341 underpinnings of the observed phenotypes are likely complex and could involve multiple cell  
342 types within the brain and gut.

343

344 We expected to observe a reduced GI transit rate in *kismet* mutant flies based on studies of *chd8*  
345 knockdown zebrafish and reported GI symptoms of humans with *CHD7/CHD8*-associated NDDs  
346 (27), where reduced gut motility is attributed to enteric nervous system (ENS) deficits. The  
347 slower GI transit rate of *kismet* mutant *Drosophila* may also be affected by reduced numbers  
348 and/or deficient innervation of enteric neurons but could also be influenced by structural and  
349 mechanical dissimilarities in the gut. For example, changes in contractility of associated visceral  
350 muscle tissue (48) or structural changes in GI-associated extracellular matrices (ECM), including  
351 the peritrophic matrix, a protective barrier that lines the lumen of the insect gut (49), could affect  
352 GI motility. GI activity may also be influenced by disruptions in regulatory hormones secreted  
353 from enteroendocrine cells (46, 47), where *kismet* is known to be expressed (33).

354

355 Our observation that flies with disrupted GI function also exhibit changes in their gut tissue  
356 mechanics is consistent with previous work, which has demonstrated the connection between GI  
357 diseases and mechanical changes in the intestine (57), including changes in stiffness (58). While  
358 our experiments do not address the underlying molecular changes in the gut tissue that give rise  
359 to the observed mechanical phenotype, the high degree of strain stiffening exhibited by *kismet*  
360 mutant guts would be consistent with changes in the mechanics or arrangements of cytoskeletal  
361 or ECM filaments. For example, stiffness changes of cytoskeletal filaments have been shown to  
362 directly result in softer reconstituted networks that undergo more dramatic strain stiffening and  
363 can withstand higher forces and strains before failing (59). In addition, the strain stiffening  
364 behavior of collagen networks in ECM can be affected by the morphology and crimp of the  
365 individual fibers (60). Finally, the peritrophic matrix is composed of aggregated parallel and  
366 antiparallel chitin microfibrils associated with chitin-binding proteins; stress-strain curves of  
367 different nanostructured chitin composites display variation in the extent of strain-softening and  
368 strain-stiffening, depending on the composition of the structure (61). *Chd8/CHD8* affects the  
369 expression of genes related to both the cytoskeleton (62) and ECM (63) in mammalian neural  
370 progenitor cells, but it is currently unknown how loss of *kismet* affects cytoskeletal and ECM  
371 gene expression in *Drosophila* gut epithelia.

372

373 We provide evidence that loss of *kismet* affects *Drosophila* gut microbiota by reducing diversity,  
374 increasing abundance of pathogenic taxa, and phenocopying characteristics associated with  
375 NDD-related gut microbiota. Our data suggest that depletion of gut microbiota can have  
376 differential impacts on courtship behavior that may vary according to the level of gut dysbiosis

377 in the native gut microbiome. Given the extensive disruptions in neurodevelopmental processes  
378 in *kismet* mutant flies, we were surprised to observe the antibiotic-mediated increase in their  
379 courtship activity. One explanation is that depletion of the *kismet* mutant-associated microbiota  
380 protects against exacerbation of neuronal phenotypes by factors that would otherwise be secreted  
381 by pathogenic microbiota. Conversely, gut microbiota depletion in control flies may induce  
382 neuronal phenotypes similar to those typically found in *kismet* mutant flies. For example,  
383 mutations in *kismet* are known to impair axogenesis (31, 34). Likewise, mice that undergo  
384 embryogenesis in antibiotic treated dams have impaired axon development (64); thus, it would  
385 be interesting to explore how gut microbiota depletion impacts neuronal phenotypes, like axon  
386 growth and guidance, in *Drosophila*.

387

388 There are contradictory results in the field regarding the influence gut microbiota have on  
389 *Drosophila* behavior. Changes in gut flora have been attributed to a variety of behavioral  
390 changes in fruit flies, including deficits in social behavior (65), sleep (66), and learning and  
391 memory (66), though at least two studies have reported insignificant impacts of gut microbiota  
392 on *Drosophila* behaviors, including courtship (67, 68). Based on our findings, one explanation  
393 for the lack of consensus in the field could be that behavioral consequences of microbiota  
394 depletion are dependent on the composition of the *Drosophila* gut microbiome, which is known  
395 to vary widely across genotypes and lab environments (69-71).

396

397 Although it is unclear how loss of *kismet* promotes changes in gut flora that influence behavior,  
398 the corresponding changes in GI transit time and biomechanical properties of the gut are likely  
399 involved. Modifications in the peritrophic matrix composition could account for changes in

400 mechanical properties and potentially explain discrepancies in the gut-brain axis—the peritrophic  
401 matrix provides a barrier function (72), so changes in its structure could affect permeability to  
402 microbes and their metabolites. While further studies are required to elucidate the reciprocal  
403 interplay between mechanics, microbiota, and brain, as well as to examine the biophysical  
404 mechanisms involved, we suggest that *kismet*-mediated changes in gut structure, mechanics, and  
405 function has important roles in the gut-brain axis paradigm.

406

407

408

## 409 Acknowledgements

410  
411 We would like to extend our gratitude to our staff for invaluable support, especially Douglas  
412 Whited, Gordon Zanotti and Caitlin Fox.

## 413 414 415 References

- 416  
417
- 418 1. Clemente JC, Ursell LK, Parfrey LW, Knight R. The impact of the gut microbiota on  
419 human health: an integrative view. *Cell*. 2012;148(6):1258-70.
  - 420 2. Sampson TR, Mazmanian SK. Control of brain development, function, and behavior by  
421 the microbiome. *Cell Host Microbe*. 2015;17(5):565-76.
  - 422 3. Li H, Xiang Y, Zhu Z, Wang W, Jiang Z, Zhao M, et al. Rifaximin-mediated gut  
423 microbiota regulation modulates the function of microglia and protects against CUMS-induced  
424 depression-like behaviors in adolescent rat. *J Neuroinflammation*. 2021;18(1):254.
  - 425 4. Volkova A, Ruggles K, Schulfer A, Gao Z, Ginsberg SD, Blaser MJ. Effects of early-life  
426 penicillin exposure on the gut microbiome and frontal cortex and amygdala gene expression.  
427 *iScience*. 2021;24(7):102797.
  - 428 5. Jacobs JP, Gupta A, Bhatt RR, Brawer J, Gao K, Tillisch K, et al. Cognitive behavioral  
429 therapy for irritable bowel syndrome induces bidirectional alterations in the brain-gut-  
430 microbiome axis associated with gastrointestinal symptom improvement. *Microbiome*.  
431 2021;9(1):236.
  - 432 6. Yaghoubfar R, Behrouzi A, Ashrafian F, Shahryari A, Moradi HR, Choopani S, et al.  
433 Modulation of serotonin signaling/metabolism by *Akkermansia muciniphila* and its extracellular  
434 vesicles through the gut-brain axis in mice. *Sci Rep*. 2020;10(1):22119.
  - 435 7. Silva YP, Bernardi A, Frozza RL. The Role of Short-Chain Fatty Acids From Gut  
436 Microbiota in Gut-Brain Communication. *Front Endocrinol (Lausanne)*. 2020;11:25.
  - 437 8. Zhao Y, Jaber V, Lukiw WJ. Secretory Products of the Human GI Tract Microbiome and  
438 Their Potential Impact on Alzheimer's Disease (AD): Detection of Lipopolysaccharide (LPS) in  
439 AD Hippocampus. *Front Cell Infect Microbiol*. 2017;7:318.
  - 440 9. Forsythe P, Bienenstock J, Kunze WA. Vagal pathways for microbiome-brain-gut axis  
441 communication. *Adv Exp Med Biol*. 2014;817:115-33.
  - 442 10. Bonaz B, Bazin T, Pellissier S. The Vagus Nerve at the Interface of the Microbiota-Gut-  
443 Brain Axis. *Front Neurosci*. 2018;12:49.
  - 444 11. Cawthon CR, de La Serre CB. Gut bacteria interaction with vagal afferents. *Brain Res*.  
445 2018;1693(Pt B):134-9.
  - 446 12. Bharwani A, West C, Champagne-Jorgensen K, McVey Neufeld KA, Ruberto J, Kunze  
447 WA, et al. The vagus nerve is necessary for the rapid and widespread neuronal activation in the  
448 brain following oral administration of psychoactive bacteria. *Neuropharmacology*.  
449 2020;170:108067.
  - 450 13. Warner BB. The contribution of the gut microbiome to neurodevelopment and  
451 neuropsychiatric disorders. *Pediatr Res*. 2019;85(2):216-24.

- 452 14. Coretti L, Paparo L, Riccio MP, Amato F, Cuomo M, Natale A, et al. Gut Microbiota  
453 Features in Young Children With Autism Spectrum Disorders. *Front Microbiol.* 2018;9:3146.
- 454 15. Kang D-W, Adams JB, Coleman DM, Pollard EL, Maldonado J, McDonough-Means S,  
455 et al. Long-term benefit of Microbiota Transfer Therapy on autism symptoms and gut  
456 microbiota. *Scientific Reports.* 2019;9(1):5821.
- 457 16. Finegold SM, Dowd SE, Gontcharova V, Liu C, Henley KE, Wolcott RD, et al.  
458 Pyrosequencing study of fecal microflora of autistic and control children. *Anaerobe.*  
459 2010;16(4):444-53.
- 460 17. De Angelis M, Piccolo M, Vannini L, Siragusa S, De Giacomo A, Serrazzanetti DI, et al.  
461 Fecal microbiota and metabolome of children with autism and pervasive developmental disorder  
462 not otherwise specified. *PLoS One.* 2013;8(10):e76993.
- 463 18. Zhang M, Ma W, Zhang J, He Y, Wang J. Analysis of gut microbiota profiles and  
464 microbe-disease associations in children with autism spectrum disorders in China. *Sci Rep.*  
465 2018;8(1):13981.
- 466 19. Tomova A, Husarova V, Lakatosova S, Bakos J, Vlkova B, Babinska K, et al.  
467 Gastrointestinal microbiota in children with autism in Slovakia. *Physiol Behav.* 2015;138:179-  
468 87.
- 469 20. Strati F, Cavalieri D, Albanese D, De Felice C, Donati C, Hayek J, et al. New evidences  
470 on the altered gut microbiota in autism spectrum disorders. *Microbiome.* 2017;5(1):24.
- 471 21. Li Y, Luo Z-Y, Hu Y-Y, Bi Y-W, Yang J-M, Zou W-J, et al. The gut microbiota  
472 regulates autism-like behavior by mediating vitamin B6 homeostasis in EphB6-deficient mice.  
473 *Microbiome.* 2020;8(1):120.
- 474 22. Sharon G, Cruz NJ, Kang D-W, Gandal MJ, Wang B, Kim Y-M, et al. Human Gut  
475 Microbiota from Autism Spectrum Disorder Promote Behavioral Symptoms in Mice. *Cell.*  
476 2019;177(6):1600-18.e17.
- 477 23. Salim S, Banu A, Alwa A, Gowda SBM, Mohammad F. The gut-microbiota-brain axis in  
478 autism: what *Drosophila* models can offer? *J Neurodev Disord.* 2021;13(1):37.
- 479 24. Capo F, Wilson A, Di Cara F. The Intestine of *Drosophila melanogaster*: An Emerging  
480 Versatile Model System to Study Intestinal Epithelial Homeostasis and Host-Microbial  
481 Interactions in Humans. *Microorganisms.* 2019;7(9).
- 482 25. Vissers LE, van Ravenswaaij CM, Admiraal R, Hurst JA, de Vries BB, Janssen IM, et al.  
483 Mutations in a new member of the chromodomain gene family cause CHARGE syndrome. *Nat*  
484 *Genet.* 2004;36(9):955-7.
- 485 26. Stessman HA, Xiong B, Coe BP, Wang T, Hoekzema K, Fencikova M, et al. Targeted  
486 sequencing identifies 91 neurodevelopmental-disorder risk genes with autism and  
487 developmental-disability biases. *Nat Genet.* 2017;49(4):515-26.
- 488 27. Bernier R, Golzio C, Xiong B, Stessman HA, Coe BP, Penn O, et al. Disruptive CHD8  
489 mutations define a subtype of autism early in development. *Cell.* 2014;158(2):263-76.
- 490 28. Satterstrom FK, Kosmicki JA, Wang J, Breen MS, De Rubeis S, An JY, et al. Large-  
491 Scale Exome Sequencing Study Implicates Both Developmental and Functional Changes in the  
492 Neurobiology of Autism. *Cell.* 2020;180(3):568-84 e23.
- 493 29. Blake KD, Hudson AS. Gastrointestinal and feeding difficulties in CHARGE syndrome:  
494 A review from head-to-toe. *Am J Med Genet C Semin Med Genet.* 2017;175(4):496-506.
- 495 30. Niesler B, Rappold GA. Emerging evidence for gene mutations driving both brain and  
496 gut dysfunction in autism spectrum disorder. *Mol Psychiatry.* 2021;26(5):1442-4.



- 497 31. Melicharek DJ, Ramirez LC, Singh S, Thompson R, Marena DR. Kismet/CHD7  
498 regulates axon morphology, memory and locomotion in a Drosophila model of CHARGE  
499 syndrome. *Hum Mol Genet.* 2010;19(21):4253-64.
- 500 32. Gervais L, van den Beek M, Jossierand M, Salle J, Stefanutti M, Perdigoto CN, et al.  
501 Stem Cell Proliferation Is Kept in Check by the Chromatin Regulators Kismet/CHD7/CHD8 and  
502 Trr/MLL3/4. *Dev Cell.* 2019;49(4):556-73 e6.
- 503 33. Hung RJ, Hu Y, Kirchner R, Liu Y, Xu C, Comjean A, et al. A cell atlas of the adult  
504 Drosophila midgut. *Proc Natl Acad Sci U S A.* 2020;117(3):1514-23.
- 505 34. Latcheva NK, Viveiros JM, Marena DR. The Drosophila Chromodomain Protein  
506 Kismet Activates Steroid Hormone Receptor Transcription to Govern Axon Pruning and  
507 Memory In Vivo. *iScience.* 2019;16:79-93.
- 508 35. Latcheva NK, Delaney TL, Viveiros JM, Smith RA, Bernard KM, Harsin B, et al. The  
509 CHD Protein, Kismet, is Important for the Recycling of Synaptic Vesicles during Endocytosis.  
510 *Sci Rep.* 2019;9(1):19368.
- 511 36. Ghosh R, Vegesna S, Safi R, Bao H, Zhang B, Marena DR, et al. Kismet positively  
512 regulates glutamate receptor localization and synaptic transmission at the Drosophila  
513 neuromuscular junction. *PLoS One.* 2014;9(11):e113494.
- 514 37. Coll-Tane M, Gong NN, Belfer SJ, van Renssen LV, Kurtz-Nelson EC, Szuperak M, et  
515 al. The CHD8/CHD7/Kismet family links blood-brain barrier glia and serotonin to ASD-  
516 associated sleep defects. *Sci Adv.* 2021;7(23).
- 517 38. Melicharek D, Shah A, DiStefano G, Gangemi AJ, Orapallo A, Vrailas-Mortimer AD, et  
518 al. Identification of novel regulators of atonal expression in the developing Drosophila retina.  
519 *Genetics.* 2008;180(4):2095-110.
- 520 39. Cognigni P, Bailey AP, Miguel-Aliaga I. Enteric neurons and systemic signals couple  
521 nutritional and reproductive status with intestinal homeostasis. *Cell Metab.* 2011;13(1):92-104.
- 522 40. Martin M. Cutadapt removes adapter sequences from high-throughput sequencing reads.  
523 *EMBnetjournal.* 2011;17:10-2.
- 524 41. Bolyen E, Rideout JR, Dillon MR, Bokulich NA, Abnet CC, Al-Ghalith GA, et al.  
525 Reproducible, interactive, scalable and extensible microbiome data science using QIIME 2. *Nat*  
526 *Biotechnol.* 2019;37(8):852-7.
- 527 42. Callahan BJ, McMurdie PJ, Rosen MJ, Han AW, Johnson AJ, Holmes SP. DADA2:  
528 High-resolution sample inference from Illumina amplicon data. *Nat Methods.* 2016;13(7):581-3.
- 529 43. Parks DH, Chuvochina M, Rinke C, Mussig AJ, Chaumeil PA, Hugenholtz P. GTDB: an  
530 ongoing census of bacterial and archaeal diversity through a phylogenetically consistent, rank  
531 normalized and complete genome-based taxonomy. *Nucleic Acids Res.* 2021.
- 532 44. Bisanz J. qiime2R: Importing QIIME2 artifacts and associated data into R  
533 sessions.v.0.99. <https://github.com/jbisanz/qiime2R>. 2018.
- 534 45. Heys C, Lize A, Blow F, White L, Darby A, Lewis ZJ. The effect of gut microbiota  
535 elimination in Drosophila melanogaster: A how-to guide for host-microbiota studies. *Ecol Evol.*  
536 2018;8(8):4150-61.
- 537 46. Zhou X, Ding G, Li J, Xiang X, Rushworth E, Song W. Physiological and Pathological  
538 Regulation of Peripheral Metabolism by Gut-Peptide Hormones in Drosophila. *Front Physiol.*  
539 2020;11:577717.
- 540 47. Benguetat O, Jneid R, Soltys J, Loudhaief R, Brun-Barale A, Osman D, et al. The  
541 DH31/CGRP enteroendocrine peptide triggers intestinal contractions favoring the elimination of  
542 opportunistic bacteria. *PLoS Pathog.* 2018;14(9):e1007279.

- 543 48. Royet J. Epithelial homeostasis and the underlying molecular mechanisms in the gut of  
544 the insect model *Drosophila melanogaster*. *Cell Mol Life Sci*. 2011;68(22):3651-60.
- 545 49. Bolognesi R, Terra WR, Ferreira C. Peritrophic membrane role in enhancing digestive  
546 efficiency. Theoretical and experimental models. *J Insect Physiol*. 2008;54(10-11):1413-22.
- 547 50. Broderick NA, Buchon N, Lemaître B. Microbiota-induced changes in *Drosophila*  
548 *melanogaster* host gene expression and gut morphology. *mBio*. 2014;5(3):e01117-14.
- 549 51. Bajinka O, Tan Y, Abdelhalim KA, Ozdemir G, Qiu X. Extrinsic factors influencing gut  
550 microbes, the immediate consequences and restoring eubiosis. *AMB Express*. 2020;10(1):130.
- 551 52. Obata F, Fons CO, Gould AP. Early-life exposure to low-dose oxidants can increase  
552 longevity via microbiome remodelling in *Drosophila*. *Nat Commun*. 2018;9(1):975.
- 553 53. Galac MR, Lazzaro BP. Comparative pathology of bacteria in the genus *Providencia* to a  
554 natural host, *Drosophila melanogaster*. *Microbes Infect*. 2011;13(7):673-83.
- 555 54. Bojovic K, Ignjatovic Eth I, Sokovic Bajic S, Vojnovic Milutinovic D, Tomic M, Golic  
556 N, et al. Gut Microbiota Dysbiosis Associated With Altered Production of Short Chain Fatty  
557 Acids in Children With Neurodevelopmental Disorders. *Front Cell Infect Microbiol*.  
558 2020;10:223.
- 559 55. De Angelis M, Francavilla R, Piccolo M, De Giacomo A, Gobbetti M. Autism spectrum  
560 disorders and intestinal microbiota. *Gut Microbes*. 2015;6(3):207-13.
- 561 56. Au - Koemans TS, Au - Oppitz C, Au - Donders RAT, Au - van Bokhoven H, Au -  
562 Schenck A, Au - Keleman K, et al. *Drosophila* Courtship Conditioning As a Measure of  
563 Learning and Memory. *JoVE*. 2017(124):e55808.
- 564 57. Siri S, Zhao Y, Maier F, Pierce DM, Feng B. The Macro- and Micro-Mechanics of the  
565 Colon and Rectum I: Experimental Evidence. *Bioengineering (Basel)*. 2020;7(4).
- 566 58. Stewart DC, Berrie D, Li J, Liu X, Rickerson C, Mkoji D, et al. Quantitative assessment  
567 of intestinal stiffness and associations with fibrosis in human inflammatory bowel disease. *PLoS*  
568 *One*. 2018;13(7):e0200377.
- 569 59. Jensen MH, Morris EJ, Gallant CM, Morgan KG, Weitz DA, Moore JR. Mechanism of  
570 calponin stabilization of cross-linked actin networks. *Biophys J*. 2014;106(4):793-800.
- 571 60. Jan NJ, Brazile BL, Hu D, Grube G, Wallace J, Gogola A, et al. Crimp around the globe;  
572 patterns of collagen crimp across the corneoscleral shell. *Exp Eye Res*. 2018;172:159-70.
- 573 61. Mushi NE, Utsel S, Berglund LA. Nanostructured biocomposite films of high toughness  
574 based on native chitin nanofibers and chitosan. *Front Chem*. 2014;2:99.
- 575 62. Durak O, Gao F, Kaeser-Woo YJ, Rueda R, Martorell AJ, Nott A, et al. Chd8 mediates  
576 cortical neurogenesis via transcriptional regulation of cell cycle and Wnt signaling. *Nat*  
577 *Neurosci*. 2016;19(11):1477-88.
- 578 63. Wang P, Lin M, Pedrosa E, Hrabovsky A, Zhang Z, Guo W, et al. CRISPR/Cas9-  
579 mediated heterozygous knockout of the autism gene CHD8 and characterization of its  
580 transcriptional networks in neurodevelopment. *Mol Autism*. 2015;6:55.
- 581 64. Vuong HE, Pronovost GN, Williams DW, Coley EJJ, Siegler EL, Qiu A, et al. The  
582 maternal microbiome modulates fetal neurodevelopment in mice. *Nature*. 2020;586(7828):281-6.
- 583 65. Chen K, Luan X, Liu Q, Wang J, Chang X, Snijders AM, et al. *Drosophila* Histone  
584 Demethylase KDM5 Regulates Social Behavior through Immune Control and Gut Microbiota  
585 Maintenance. *Cell Host Microbe*. 2019;25(4):537-52 e8.
- 586 66. Silva V, Palacios-Munoz A, Okray Z, Adair KL, Waddell S, Douglas AE, et al. The  
587 impact of the gut microbiome on memory and sleep in *Drosophila*. *J Exp Biol*. 2021;224(Pt 3).

- 588 67. Jia Y, Jin S, Hu K, Geng L, Han C, Kang R, et al. Gut microbiome modulates *Drosophila*  
589 aggression through octopamine signaling. *Nat Commun*. 2021;12(1):2698.
- 590 68. Selkrig J, Mohammad F, Ng SH, Chua JY, Tumkaya T, Ho J, et al. The *Drosophila*  
591 microbiome has a limited influence on sleep, activity, and courtship behaviors. *Sci Rep*.  
592 2018;8(1):10646.
- 593 69. Early AM, Shanmugarajah N, Buchon N, Clark AG. *Drosophila* Genotype Influences  
594 Commensal Bacterial Levels. *PLoS One*. 2017;12(1):e0170332.
- 595 70. Wong AC, Chaston JM, Douglas AE. The inconstant gut microbiota of *Drosophila*  
596 species revealed by 16S rRNA gene analysis. *ISME J*. 2013;7(10):1922-32.
- 597 71. Broderick NA, Lemaitre B. Gut-associated microbes of *Drosophila melanogaster*. *Gut*  
598 *Microbes*. 2012;3(4):307-21.
- 599 72. Kuraishi T, Binggeli O, Opota O, Buchon N, Lemaitre B. Genetic evidence for a  
600 protective role of the peritrophic matrix against intestinal bacterial infection in *Drosophila*  
601 *melanogaster*. *Proc Natl Acad Sci U S A*. 2011;108(38):15966-71.  
602
